# Supplementary material
Source: PubMed Central journal article supplement (PMC3075560)
Supplement: NIHMS253155-supplement-4.pdf [file NIHMS253155-supplement-4.pdf]

## **SUPPLEMENTARY INFORMATION**

### **Histamine deficiency promotes inflammation-associated carcinogenesis through reduced myeloid maturation and accumulation of CD11b<sup>+</sup>Ly6G<sup>+</sup> immature myeloid cells**

Xiang Dong Yang<sup>1</sup>, Walden Ai<sup>1,7</sup>, Samuel Asfaha<sup>1</sup>, Govind Bhagat<sup>2</sup>, Richard A. Friedman<sup>3</sup>, Guangchun Jin<sup>1</sup>, Heuijoon Park<sup>1</sup>, Benjamin Shykind<sup>4</sup>, Thomas G Diacovo<sup>5</sup>, Andras Falus<sup>6</sup>, Timothy C Wang<sup>1</sup>

<sup>1</sup>Division of Digestive and Liver Diseases, Department of Medicine and Irving Cancer Center, Columbia University, New York, NY 10032;

<sup>2</sup>Department of Pathology and Cell Biology, Columbia University;

<sup>3</sup>Department of Biomedical Informatics, Columbia University;

<sup>4</sup>Department of Neuroscience, Columbia University;

<sup>5</sup>Department of Pediatrics, Columbia University;

<sup>6</sup>Department of Genetics, Cell and Immunobiology, Semmelweis University, H-1089 Budapest, Hungary;

<sup>7</sup>Department of Pathology, Microbiology and Immunology, University of South Carolina School of Medicine, Columbia, SC 29208.

**Supplementary Tables 1-4**

## Legends for supplementary Tables 1- 4

Differentially expressed genes of CD11b<sup>+</sup>Gr-1<sup>+</sup> IMCs were examined by microarray (Affymetrix Mouse 430.2 array). Total RNA of Hdc-expressing CD11b<sup>+</sup>Gr-1<sup>+</sup> IMCs of bone marrow were extracted from *Hdc*-EGFP and *Hdc*-EGFP/*Hdc*<sup>-/-</sup> mice (3 mice in each group). CD11b<sup>+</sup>Gr-1<sup>+</sup> MDSCs from colonic tumors were sorted from 10-12 tumors from WT and *Hdc*<sup>-/-</sup> mice (5 mice in each group) and pooled to extract total RNA for Microarray studies. Four sets of comparisons were performed to screen the upregulated or downregulated genes in the CD11b<sup>+</sup>Gr-1<sup>+</sup> IMCs or MDSCs (experiment group) from *Hdc*<sup>-/-</sup> versus WT mice. Set 1: *Hdc*-expressing CD11b<sup>+</sup>Gr-1<sup>+</sup> IMCs from the bone marrow of *Hdc*<sup>-/-</sup> mice compared to bone marrow-derived IMCs of WT mice. Set 2: CD11b<sup>+</sup>Gr-1<sup>+</sup> MDSCs from tumors of *Hdc*<sup>-/-</sup> mice compared to MDSCs from WT mice. Set 3: CD11b<sup>+</sup>Gr-1<sup>+</sup> MDSCs of WT colonic tumors compared to IMCs in WT bone marrow. Set 4: CD11b<sup>+</sup>Gr-1<sup>+</sup> MDSCs of colonic tumors from *Hdc*<sup>-/-</sup> mice compared to IMCs from the bone marrow of *Hdc*<sup>-/-</sup> mice. Table 1. Upregulated (abundant) genes of inflammatory cytokines and receptors in *Hdc*<sup>-/-</sup> mice. Table 2. Upregulated (abundant) genes of chemokines and chemokine receptors in *Hdc*<sup>-/-</sup> mice. Table 3. Upregulated (abundant) genes of adhesion molecule genes in *Hdc*<sup>-/-</sup> mice. Table 4. Upregulated (abundant) DNA methylation related genes in *Hdc*<sup>-/-</sup> mice.

# Supplementary Table. 1

## Microarray data (1): Inflammatory cytokines and receptors

**a**

| Control 1                           | CD11b <sup>+</sup> Gr-1 <sup>+</sup> IMCs of WT bone marrow                         |                                |
|-------------------------------------|-------------------------------------------------------------------------------------|--------------------------------|
| Experiment 1 (genes MORE abundant ) | CD11b <sup>+</sup> Gr-1 <sup>+</sup> MDSCs of <i>Hdc</i> <sup>-/-</sup> bone marrow |                                |
| Log2 Ratio                          | Gene Symbol                                                                         | Gene Description               |
| 1.34                                | IL-7 R                                                                              | interleukin 7 receptor         |
| 0.62                                | IL-1                                                                                | interleukin 1 family,          |
| 0.59                                | IL-17 RA                                                                            | interleukin 17 receptor A      |
| 0.59                                | IL-18 bp                                                                            | interleukin 18 binding protein |
| 0.38                                | IL-6 R                                                                              | interleukin 6 receptor, alpha  |
| 0.22                                | IL-18                                                                               | interleukin 18                 |

**b**

| Control 2                           | CD11b <sup>+</sup> Gr-1 <sup>+</sup> IMCs of WT colon tumor                         |                                          |
|-------------------------------------|-------------------------------------------------------------------------------------|------------------------------------------|
| Experiment 2 (genes MORE abundant ) | CD11b <sup>+</sup> Gr-1 <sup>+</sup> MDSCs of <i>Hdc</i> <sup>-/-</sup> colon tumor |                                          |
| Log2 Ratio                          | Gene Symbol                                                                         | Gene Description                         |
| 2.59                                | IL-18                                                                               | interleukin 18                           |
| 1.65                                | IL-1RAP                                                                             | interleukin 1 receptor accessory protein |
| 1.56                                | IL-17 R-c                                                                           | interleukin 17 receptor C                |
| 1.28                                | IL-15                                                                               | interleukin 15                           |
| 1.28                                | IL-13 R                                                                             | interleukin 13 receptor, alpha           |
| 1.26                                | IL-10 R                                                                             | interleukin 10 receptor, alpha           |
| 0.93                                | IL-17 R-a                                                                           | interleukin 17 receptor A                |
| 0.75                                | IL-6 R-a                                                                            | interleukin 6 receptor, alpha            |

**c**

| Control 3                           | CD11b <sup>+</sup> Gr-1 <sup>+</sup> IMCs of WT bone marrow  |                                           |
|-------------------------------------|--------------------------------------------------------------|-------------------------------------------|
| Experiment 3 (genes MORE abundant ) | CD11b <sup>+</sup> Gr-1 <sup>+</sup> MDSCs of WT colon tumor |                                           |
| Log2 Ratio                          | Gene Symbol                                                  | Gene Description                          |
| 9.01                                | IL-1 $\alpha$                                                | interleukin 1 alpha                       |
| 8.02                                | IL-6                                                         | interleukin 6                             |
| 2.97                                | IL-7 R                                                       | interleukin 7 receptor                    |
| 2.52                                | IL-1 $\beta$                                                 | interleukin 1 beta                        |
| 2.51                                | IL-10 R                                                      | interleukin 10 receptor, alpha            |
| 2.38                                | IL-13 R                                                      | interleukin 13 receptor, alpha            |
| 1.96                                | IL-18                                                        | interleukin 18                            |
| 1.72                                | IL-10                                                        | interleukin 10                            |
| 1.07                                | IL-4 R                                                       | interleukin 4 receptor, alpha             |
| 0.13                                | IL-18 RAP                                                    | interleukin 18 receptor accessory protein |

**d**

| Control 4                           | CD11b <sup>+</sup> Gr-1 <sup>+</sup> IMCs of <i>Hdc</i> <sup>-/-</sup> bone marrow  |                                          |
|-------------------------------------|-------------------------------------------------------------------------------------|------------------------------------------|
| Experiment 4 (genes MORE abundant ) | CD11b <sup>+</sup> Gr-1 <sup>+</sup> MDSCs of <i>Hdc</i> <sup>-/-</sup> colon tumor |                                          |
| Log2 Ratio                          | Gene Symbol                                                                         | Gene Description                         |
| 8.55                                | IL-1 $\alpha$                                                                       | interleukin 1 alpha                      |
| 8.54                                | IL-6                                                                                | interleukin 6                            |
| 5.78                                | IL-10 R                                                                             | interleukin 10 receptor, alpha           |
| 4.35                                | IL-13 R                                                                             | interleukin 13 receptor, alpha           |
| 4.33                                | IL-18                                                                               | interleukin 18                           |
| 3.7                                 | IL-1 $\beta$                                                                        | interleukin 1 beta                       |
| 3.08                                | IL-23 R                                                                             | interleukin 23, alpha subunit p19        |
| 2.49                                | IL-1RAP                                                                             | interleukin 1 receptor accessory protein |
| 2.39                                | IL-4 R                                                                              | interleukin 4 receptor, alpha            |
| 2.32                                | IL-7 R                                                                              | interleukin 7 receptor                   |
| 1.79                                | IL-17 R-c                                                                           | interleukin 17 receptor C                |
| 1.72                                | IL-10                                                                               | interleukin 10                           |
| 1.29                                | IL-1 R II                                                                           | interleukin 1 receptor, type II          |

**Table 1.** Upregulated (abundant) genes of inflammatory cytokines and receptors in *Hdc*<sup>-/-</sup> mice.

# Supplementary Table. 2

## Microarray data (2): Chemokines and chemokine receptors

**a**

| Control 1                           | CD11b <sup>+</sup> Gr-1 <sup>+</sup> IMCs of WT bone marrow                         |                                    |
|-------------------------------------|-------------------------------------------------------------------------------------|------------------------------------|
| Experiment 1 (genes MORE abundant ) | CD11b <sup>+</sup> Gr-1 <sup>+</sup> MDSCs of <i>Hdc</i> <sup>-/-</sup> bone marrow |                                    |
| Log2 Ratio                          | Gene Symbol                                                                         | Gene Description                   |
| 0.76                                | CCR-2                                                                               | chemokine (C-C motif) receptor 2   |
| 0.48                                | CXCR-4                                                                              | chemokine (C-X-C motif) receptor 4 |
| 0.45                                | CCR-4                                                                               | chemokine (C-C motif) receptor 4   |
| 0.36                                | CXCL-5                                                                              | chemokine (C-X-C motif) ligand 5   |

**b**

| Control 2                           | CD11b <sup>+</sup> Gr-1 <sup>+</sup> IMCs of WT colon tumor                         |                                    |
|-------------------------------------|-------------------------------------------------------------------------------------|------------------------------------|
| Experiment 2 (genes MORE abundant ) | CD11b <sup>+</sup> Gr-1 <sup>+</sup> MDSCs of <i>Hdc</i> <sup>-/-</sup> colon tumor |                                    |
| Log2 Ratio                          | Gene Symbol                                                                         | Gene Description                   |
| 4.78                                | CCL-5                                                                               | chemokine (C-C motif) ligand 5     |
| 4.27                                | CCR-3                                                                               | chemokine (C-C motif) receptor 3   |
| 2.83                                | CCR-9                                                                               | chemokine (C-C motif) receptor 9   |
| 2.19                                | CCR-2                                                                               | chemokine (C-C motif) receptor 2   |
| 2.05                                | CCR-6                                                                               | chemokine (C-C motif) receptor 6   |
| 2.03                                | CCL-28                                                                              | chemokine (C-C motif) ligand 28    |
| 1.12                                | CXCL-5                                                                              | chemokine (C-X-C motif) ligand 5   |
| 0.99                                | CXCR-3                                                                              | chemokine (C-X-C motif) receptor 3 |
| 0.97                                | CCL-6                                                                               | chemokine (C-C motif) ligand 6     |
| 0.9                                 | CCL-9                                                                               | chemokine (C-C motif) ligand 9     |
| 0.83                                | CXCL-10                                                                             | chemokine (C-X-C motif) ligand 10  |

**c**

| Control 3                           | CD11b <sup>+</sup> Gr-1 <sup>+</sup> IMCs of WT bone marrow  |                                       |
|-------------------------------------|--------------------------------------------------------------|---------------------------------------|
| Experiment 3 (genes MORE abundant ) | CD11b <sup>+</sup> Gr-1 <sup>+</sup> MDSCs of WT colon tumor |                                       |
| Log2 Ratio                          | Gene Symbol                                                  | Gene Description                      |
| 8.94                                | CXCL-1                                                       | chemokine (C-X-C motif) ligand 1      |
| 8.44                                | CXCL-3                                                       | chemokine (C-X-C motif) ligand 3      |
| 7.52                                | CCR12                                                        | chemokine (C-C motif) receptor-like 2 |
| 6.31                                | CXCL-2                                                       | chemokine (C-X-C motif) ligand 2      |
| 5.92                                | CCL-24                                                       | chemokine (C-C motif) ligand 24       |
| 5.88                                | CCL-4                                                        | chemokine (C-C motif) ligand 4        |
| 5.76                                | CCR-5                                                        | chemokine (C-C motif) receptor 5      |
| 4.46                                | CCR-2                                                        | chemokine (C-C motif) receptor 2      |
| 4.44                                | CCL-8                                                        | chemokine (C-C motif) ligand 8        |
| 3.25                                | CCL-12                                                       | chemokine (C-C motif) ligand 12       |
| 2.43                                | CCL-9                                                        | chemokine (C-C motif) ligand 9        |
| 2.42                                | CXCL-5                                                       | chemokine (C-X-C motif) ligand 5      |
| 2.12                                | CCL-2                                                        | chemokine (C-C motif) ligand 2        |
| 1.81                                | CCL-5                                                        | chemokine (C-C motif) ligand 5        |

**d**

| Control 4                           | CD11b <sup>+</sup> Gr-1 <sup>+</sup> IMCs of <i>Hdc</i> <sup>-/-</sup> bone marrow  |                                       |
|-------------------------------------|-------------------------------------------------------------------------------------|---------------------------------------|
| Experiment 4 (genes MORE abundant ) | CD11b <sup>+</sup> Gr-1 <sup>+</sup> MDSCs of <i>Hdc</i> <sup>-/-</sup> colon tumor |                                       |
| Log2 Ratio                          | Gene Symbol                                                                         | Gene Description                      |
| 10.92                               | CXCL-2                                                                              | chemokine (C-X-C motif) ligand 2      |
| 10.58                               | CXCL-3                                                                              | chemokine (C-X-C motif) ligand 3      |
| 9.92                                | CCL-3                                                                               | chemokine (C-C motif) ligand 3        |
| 8.82                                | CCR12                                                                               | chemokine (C-C motif) receptor-like 2 |
| 8.44                                | CXCL-1                                                                              | chemokine (C-X-C motif) ligand 1      |
| 6.57                                | CCL-24                                                                              | chemokine (C-C motif) ligand 24       |
| 6.32                                | CCL-4                                                                               | chemokine (C-C motif) ligand 4        |
| 5.84                                | CCR-2                                                                               | chemokine (C-C motif) receptor 2      |
| 5.61                                | CCR-5                                                                               | chemokine (C-C motif) receptor 5      |
| 5.21                                | CCR-3                                                                               | chemokine (C-C motif) receptor 3      |
| 4.63                                | CCL-8                                                                               | chemokine (C-C motif) ligand 8        |
| 4.55                                | CXCL-9                                                                              | chemokine (C-X-C motif) ligand 9      |
| 3.18                                | CXCL-5                                                                              | chemokine (C-X-C motif) ligand 5      |
| 3.01                                | CCR-9                                                                               | chemokine (C-C motif) receptor 9      |
| 2.84                                | CXCL-13                                                                             | chemokine (C-X-C motif) ligand 13     |

**Table 2.** Upregulated (abundant) genes of chemokines and chemokine receptors in *Hdc*<sup>-/-</sup> mice.

# Supplementary Table. 3

## Microarray data (3): Adhesive molecules

**a**

| Control 1                           | CD11b <sup>+</sup> Gr-1 <sup>+</sup> IMCs of WT bone marrow                         |                                   |
|-------------------------------------|-------------------------------------------------------------------------------------|-----------------------------------|
| Experiment 1 (genes MORE abundant ) | CD11b <sup>+</sup> Gr-1 <sup>+</sup> MDSCs of <i>Hdc</i> <sup>-/-</sup> bone marrow |                                   |
| Log2 Ratio                          | Gene Symbol                                                                         | Gene Description                  |
| 0.89                                | CD44                                                                                | CD44 antigen                      |
| 0.38                                | ICAM-2                                                                              | intercellular adhesion molecule 2 |
| 0.37                                | CAM-1                                                                               | cell adhesion molecule 1          |

**b**

| Control 2                           | CD11b <sup>+</sup> Gr-1 <sup>+</sup> IMCs of WT colon tumor                         |                                            |
|-------------------------------------|-------------------------------------------------------------------------------------|--------------------------------------------|
| Experiment 2 (genes MORE abundant ) | CD11b <sup>+</sup> Gr-1 <sup>+</sup> MDSCs of <i>Hdc</i> <sup>-/-</sup> colon tumor |                                            |
| Log2 Ratio                          | Gene Symbol                                                                         | Gene Description                           |
| 1.76                                | ICAM-1                                                                              | intercellular adhesion molecule 1          |
| 1.07                                | VCAM-1                                                                              | vascular cell adhesion molecule 1          |
| 0.94                                | CAM-1                                                                               | cell adhesion molecule 1                   |
| 0.79                                | ALCAM                                                                               | activated leukocyte cell adhesion molecule |
| 0.59                                | P-selectin                                                                          | selectin, platelet (p-selectin) ligand     |
| 0.51                                | CD44                                                                                | CD44 antigen, mRNA                         |
| 0.25                                | ICAM-2                                                                              | intercellular adhesion molecule 2          |

**c**

| Control 3                           | CD11b <sup>+</sup> Gr-1 <sup>+</sup> IMCs of WT bone marrow  |                                   |
|-------------------------------------|--------------------------------------------------------------|-----------------------------------|
| Experiment 3 (genes MORE abundant ) | CD11b <sup>+</sup> Gr-1 <sup>+</sup> MDSCs of WT colon tumor |                                   |
| Log2 Ratio                          | Gene Symbol                                                  | Gene Description                  |
| 4.71                                | ICAM-1                                                       | intercellular adhesion molecule 1 |
| 0.57                                | VCAM-1                                                       | vascular cell adhesion molecule 1 |
| 0.51                                | CAM-1                                                        | cell adhesion molecule 1          |
| 0.1                                 | CD44                                                         | CD44 antigen, mRNA                |
| 0.07                                | E-selectin                                                   | selectin, endothelial cell        |

**d**

| Control 4                           | CD11b <sup>+</sup> Gr-1 <sup>+</sup> IMCs of <i>Hdc</i> <sup>-/-</sup> bone marrow  |                                               |
|-------------------------------------|-------------------------------------------------------------------------------------|-----------------------------------------------|
| Experiment 4 (genes MORE abundant ) | CD11b <sup>+</sup> Gr-1 <sup>+</sup> MDSCs of <i>Hdc</i> <sup>-/-</sup> colon tumor |                                               |
| Log2 Ratio                          | Gene Symbol                                                                         | Gene Description                              |
| 6.71                                | ICAM-1                                                                              | intercellular adhesion molecule 1             |
| 4.02                                | VCAM-1                                                                              | vascular cell adhesion molecule 1             |
| 1.35                                | CAM-1                                                                               | cell adhesion molecule 1                      |
| 0.78                                | CD44                                                                                | CD44 antigen, mRNA                            |
| 0.44                                | P-selectin                                                                          | selectin, platelet (p-selectin) ligand        |
| 0.37                                | PE-CAM-1                                                                            | platelet/endothelial cell adhesion molecule 1 |

**Table 3.** Upregulated (abundant) genes of adhesion molecule genes in *Hdc*<sup>-/-</sup> mice.

# Supplementary Table. 4

## Microarray data (4): Methylation related genes

**a**

| Control 1                           | CD11b*Gr-1 <sup>+</sup> IMCs of WT bone marrow                         |                                                |
|-------------------------------------|------------------------------------------------------------------------|------------------------------------------------|
| Experiment 1 (genes MORE abundant ) | CD11b*Gr-1 <sup>+</sup> MDSCs of <i>Hdc</i> <sup>-/-</sup> bone marrow |                                                |
| Log2 Ratio                          | Gene Symbol                                                            | Gene Description                               |
| 0.38                                | Prmt5                                                                  | protein arginine N-methyltransferase 5         |
| 0.37                                | Mtap                                                                   | methylthioadenosine phosphorylase              |
| 0.34                                | Mettl3                                                                 | methyltransferase like 3                       |
| 0.28                                | As3mt                                                                  | arsenic (+3 oxidation state) methyltransferase |

**b**

| Control 2                           | CD11b*Gr-1 <sup>+</sup> IMCs of WT colon tumor                         |                                        |
|-------------------------------------|------------------------------------------------------------------------|----------------------------------------|
| Experiment 2 (genes MORE abundant ) | CD11b*Gr-1 <sup>+</sup> MDSCs of <i>Hdc</i> <sup>-/-</sup> colon tumor |                                        |
| Log2 Ratio                          | Gene Symbol                                                            | Gene Description                       |
| 5.2                                 | Mettl 7B                                                               | methyltransferase like 7B              |
| 2.08                                | Mettl 7A1                                                              | methyltransferase like 7A1             |
| 1.8                                 | Comt 1                                                                 | catechol-O-methyltransferase 1         |
| 1.54                                | Mtap                                                                   | methylthioadenosine phosphorylase      |
| 1.20                                | Prmt 2                                                                 | protein arginine N-methyltransferase 3 |
| 1.12                                | Prmt 7                                                                 | protein arginine N-methyltransferase 7 |
| 1.01                                | Prmt 3                                                                 | protein arginine N-methyltransferase 3 |
| 0.98                                | Dnmt3A                                                                 | DNA methyltransferase 3A               |
| 0.72                                | Dnmt3B                                                                 | DNA methyltransferase 3B               |
| 0.69                                | Mecp2                                                                  | methyl CpG binding protein 2           |

**c**

| Control 3                           | CD11b*Gr-1 <sup>+</sup> IMCs of WT bone marrow  |                                                |
|-------------------------------------|-------------------------------------------------|------------------------------------------------|
| Experiment 3 (genes MORE abundant ) | CD11b*Gr-1 <sup>+</sup> MDSCs of WT colon tumor |                                                |
| Log2 Ratio                          | Gene Symbol                                     | Gene Description                               |
| 2.02                                | As3mt                                           | arsenic (+3 oxidation state) methyltransferase |
| 1.15                                | Comt 1                                          | catechol-O-methyltransferase 1                 |
| 0.93                                | Prmt 2                                          | protein arginine N-methyltransferase 2         |
| 0.84                                | Mtap                                            | methylthioadenosine phosphorylase              |
| 0.69                                | Mettl 7B                                        | methyltransferase like 7B                      |

**d**

| Control 4                           | CD11b*Gr-1 <sup>+</sup> IMCs of <i>Hdc</i> <sup>-/-</sup> bone marrow  |                                                |
|-------------------------------------|------------------------------------------------------------------------|------------------------------------------------|
| Experiment 4 (genes MORE abundant ) | CD11b*Gr-1 <sup>+</sup> MDSCs of <i>Hdc</i> <sup>-/-</sup> colon tumor |                                                |
| Log2 Ratio                          | Gene Symbol                                                            | Gene Description                               |
| 5.69                                | Mettl 7B                                                               | methyltransferase like 7B                      |
| 3.06                                | Comt 1                                                                 | catechol-O-methyltransferase 1                 |
| 2.46                                | Mthfr                                                                  | 5,10-methylenetetrahydrofolate reductase       |
| 2.38                                | Mtap                                                                   | methylthioadenosine phosphorylase              |
| 2.19                                | Prmt 2                                                                 | protein arginine N-methyltransferase 3         |
| 1.85                                | As3mt                                                                  | arsenic (+3 oxidation state) methyltransferase |
| 1.07                                | Prmt 7                                                                 | protein arginine N-methyltransferase 7         |
| 1.02                                | Prmt 3                                                                 | protein arginine N-methyltransferase 3         |
| 0.82                                | Mecp2                                                                  | methyl CpG binding protein 2                   |

**Table 4.** Upregulated (abundant) DNA methylation related genes in *Hdc*<sup>-/-</sup> mice.
